# Supplementary material
Source: Springer Nature journal article supplement (https://www.springermedizin.de/resource/supplementary/12873_2005_27_MOESM1_ESM.pdf/9431830)

**ETT**

**Mannequin**

**12 inches**

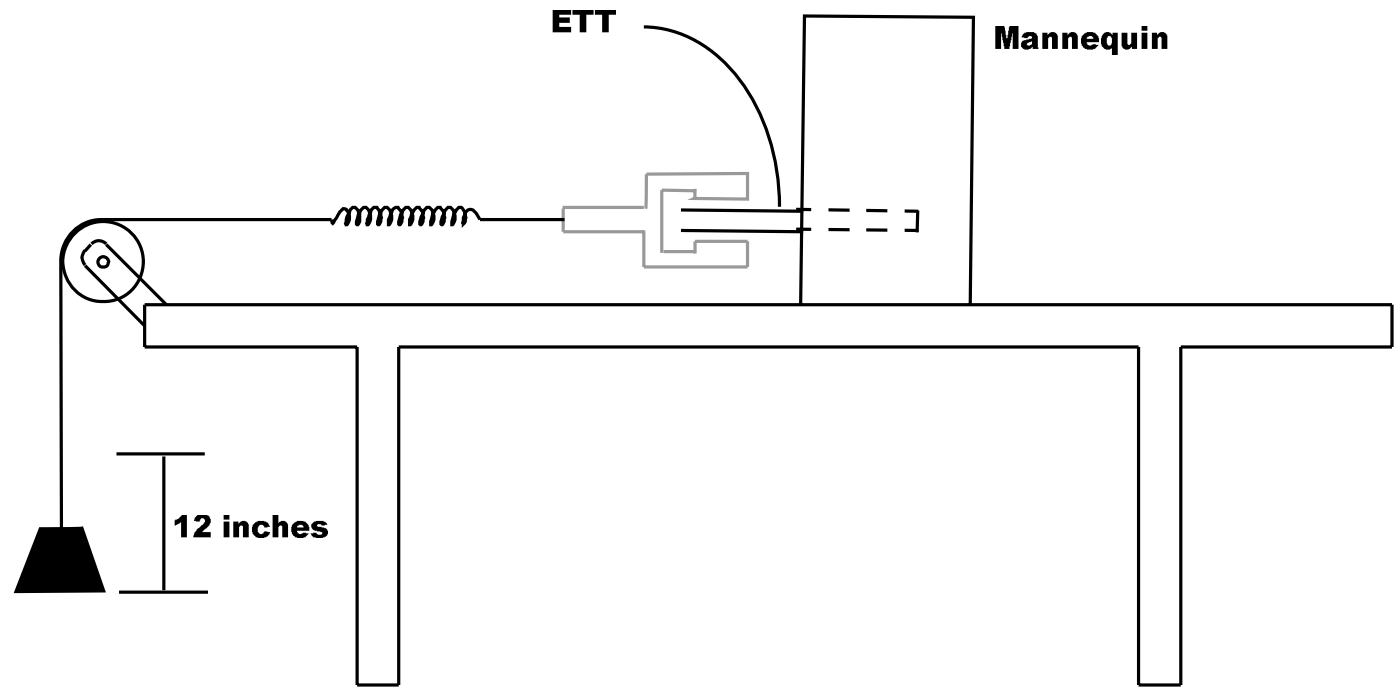

Supplement: MOESM1 [file 9431830]
